# Supplementary material
Source: Springer Nature journal article supplement (https://www.springermedizin.de/resource/supplementary/12984_2008_149_MOESM5_ESM.pdf/9605406)

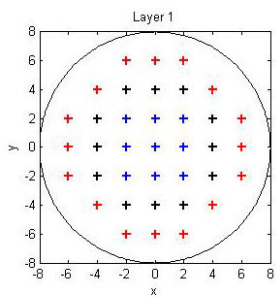

(a)

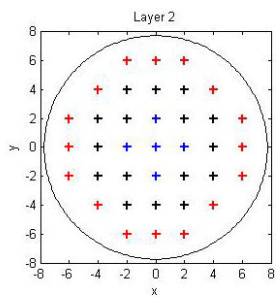

(b)

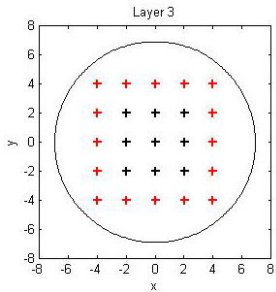

(c)

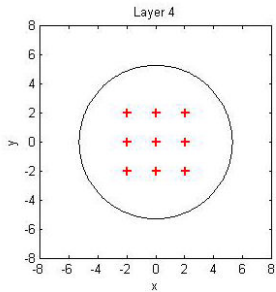

(d)

Supplement: MOESM5 [file 9605406]
